# Supplementary material for: Metabolomic differences between invasive alien plants from native and invaded habitats
Source: PubMed Central journal article supplement (PMC7297986; doi:10.1038/s41598-020-66477-w), 2020-06-16
Supplement: 41598_2020_66477_MOESM1_ESM.pdf [file 41598_2020_66477_MOESM1_ESM.pdf]

# **Metabolomic differences between invasive alien plants from native and invaded habitats**

**Short title: Metabolomic profiling of invasive alien species**

Sarah A. Skubel<sup>1</sup>, Xiaoyang Su<sup>2</sup>, Alexander Poulev<sup>1</sup>, Llewellyn C. Foxcroft<sup>3</sup>, Vyacheslav Dushenkov<sup>4</sup>, Ilya Raskin<sup>1\*</sup>

\*raskin@rutgers.edu

**1** Department of Plant Biology, Rutgers, The State University of New Jersey, New Brunswick, New Jersey, United States of America, **2** Department of Medicine, Robert Wood Johnson Medical School, Rutgers, The State University of New Jersey, New Brunswick, New Jersey, United States of America, **3** Centre for Invasion Biology, Department of Botany and Zoology, Stellenbosch University and Scientific Services, South African National Parks, South Africa **4** Hostos Community College, City University of New York, Bronx, New York, United States of America

## Supplementary Information

**S1 Table. Collection details on samples collected for the purpose of this study including country of origin, common and Latin names, date, GPS coordinates and collector initials (SS: Skubel, Sarah; RI: Raskin, Ilya, PhD).** Identifier numbers shown are continued from samples previously collected but unrelated to this study.

| ID    | Country | Common Name     | Latin Name                 | Date Collected | Coordinates               | Collected By |
|-------|---------|-----------------|----------------------------|----------------|---------------------------|--------------|
| 10-13 | US      | Blue Mistflower | <i>Chromolaena odorata</i> | 5/30/2018      | 27°56'7"N,<br>81°34'29"W  | SS           |
| 14-16 |         |                 |                            | 5/30/2018      | 27°56'4"N,<br>81°34'42"W  | SS           |
| 17-19 |         |                 |                            | 5/30/2018      | 27°56'21"N,<br>81°34'42"W | SS           |
| 20-23 |         |                 |                            | 5/30/2018      | 27°56'21"N,<br>81°34'42"W | SS           |
| 24-27 |         | Rough Cocklebur | <i>Xanthium strumarium</i> | 6/27/2018      | 40°47'57"N,<br>73°55'11"W | SS           |
| 28-31 |         |                 |                            | 6/27/2018      | 40°48'23"N,<br>73°55'33"W | SS           |
| 32-35 |         |                 |                            | 6/27/2018      | 40°47'57"N,<br>73°55'10"W | SS           |
| 36-38 |         | Jimsonweed      | <i>Datura stramonium</i>   | 6/27/2018      | 40°47'7"N,<br>73°56'7"W   | SS           |
| 39-42 |         |                 |                            | 6/27/2018      | 40°46'59"N,<br>73°56'41"W | SS           |
| 43-46 |         |                 |                            | 7/02/2018      | 40°27'27"N,<br>74°24'35"W | SS           |
|       |         |                 |                            |                |                           |              |
| 50-53 | SA      | Blue Mistflower | <i>Chromolaena odorata</i> | 7/24/2018      | 24°58'9"S,<br>31°35'38"E  | SS & RI      |
| 54-58 |         | Jimsonweed      | <i>Datura stramonium</i>   | 7/24/2018      | 24°58'9"S<br>31°35'38"E   | SS & RI      |
| 59-61 |         |                 |                            | 7/25/2018      | 24°59'1"S,<br>31°38'33"E  | SS & RI      |
| 62-67 |         | Rough Cocklebur | <i>Xanthium strumarium</i> | 7/26/2018      | 24°57'26"S,<br>31°42'56"E | SS & RI      |
| 68-74 |         |                 |                            | 7/28/2018      | 23°73"S,<br>31°27'22"E    | SS & RI      |
| 75-81 |         |                 |                            | 7/28/2018      | 23°8'41"S,<br>31°27'44"E  | SS & RI      |
| 82-88 |         |                 |                            | 7/28/2018      | 23°6'30"S,<br>31°26'16"E  | SS & RI      |

|         |    |                 |                            |           |                           |         |
|---------|----|-----------------|----------------------------|-----------|---------------------------|---------|
| 89-99   | SA | Blue Mistflower | <i>Chromolaena odorata</i> | 7/30/2018 | 22°25'31"S,<br>31°15'17"E | SS & RI |
| 100-107 |    |                 |                            | 7/31/2018 | 22°25'21S,<br>31°14'0"E   | SS & RI |
| 108-115 |    |                 |                            | 7/31/2018 | 22°25'19"S,<br>31°14'59"E | SS & RI |
| 116-123 |    |                 |                            | 7/31/2018 | 22°25'20"S,<br>31°14'46"E | SS & RI |
| 124-130 |    | Rough Cocklebur | <i>Xanthium strumarium</i> | 7/31/2018 | 22°25'21"S,<br>31°14'40"E | SS & RI |
| 131-138 |    |                 |                            | 8/3/2018  | 23°45'27"S,<br>31°22'17"E | SS & RI |
| 139-144 |    |                 |                            | 8/3/2018  | 23°45'14"S,<br>31°22'0"E  | SS & RI |
| 145-152 |    | Jimsonweed      | <i>Datura stramonium</i>   | 8/3/2018  | 23°45'14"S,<br>31°22'0"E  | SS & RI |
| 153-160 |    |                 |                            | 8/6/2018  | 23°40'55"S,<br>30°59'44"E | SS & RI |
| 161-168 |    |                 |                            | 8/6/2018  | 23°40'18"S,<br>30°59'20"E | SS & RI |

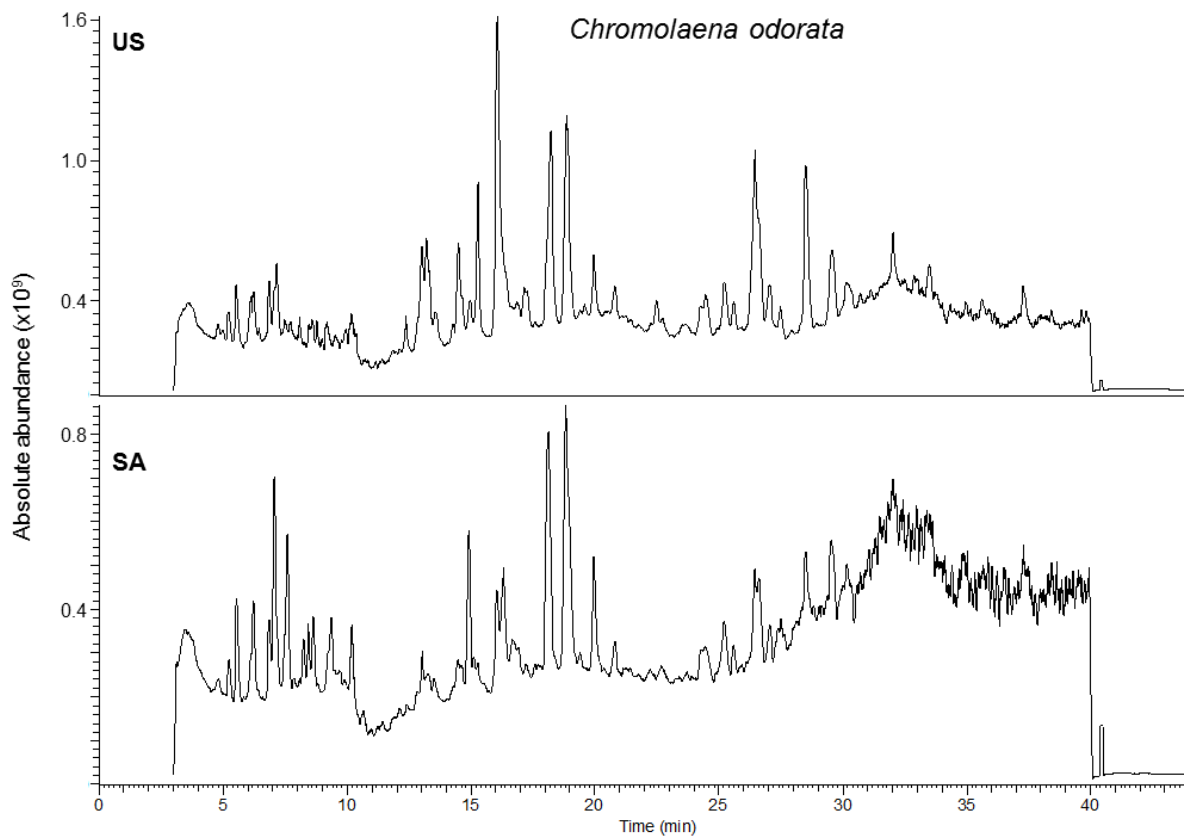

**S2 Fig. 1.** (-)ESI MS total ion current chromatograms [m/z 100 – m/z 1000] of disk eluates from *Chromolaena odorata* extracts from plants originating in the United States (US), and South Africa (SA).

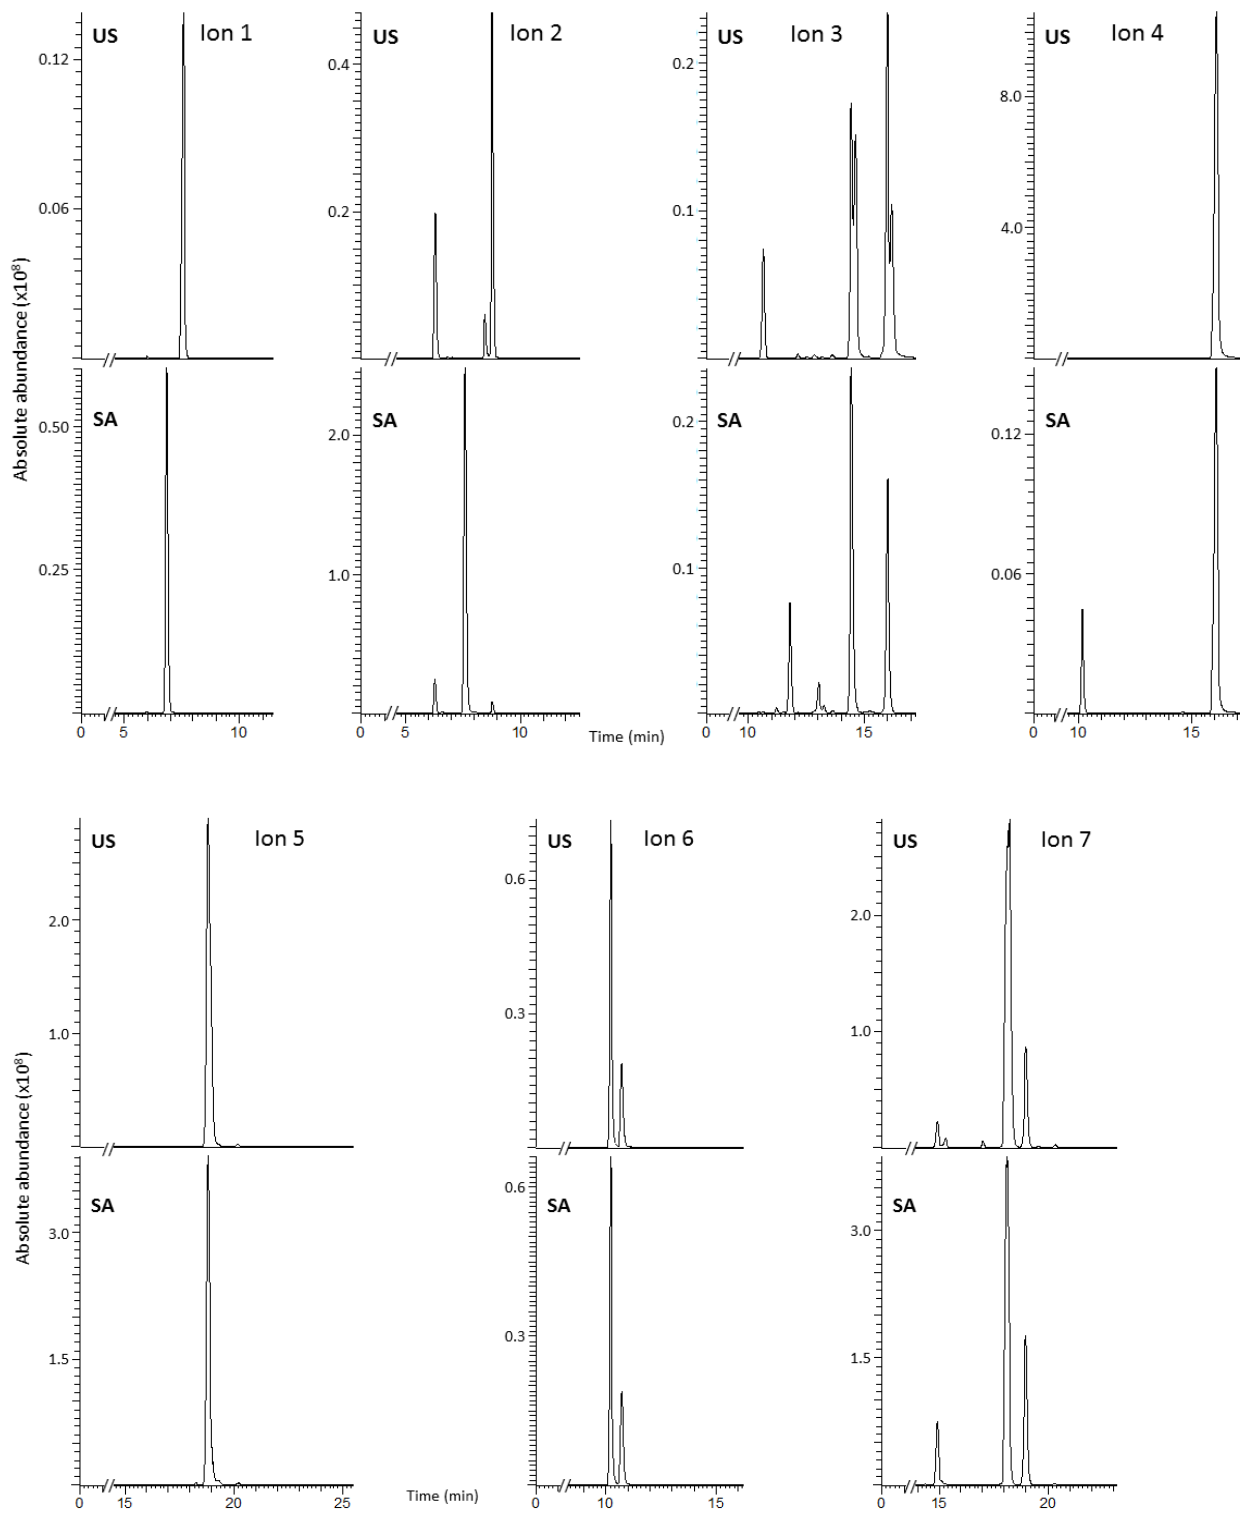

**S2 Fig. 2.** (-)ESI MS extracted ion current chromatograms of disk eluates from *Chromolaena odorata* extracts from plants originating in the United States (US), and South Africa (SA). Ion number details – see Table 1.

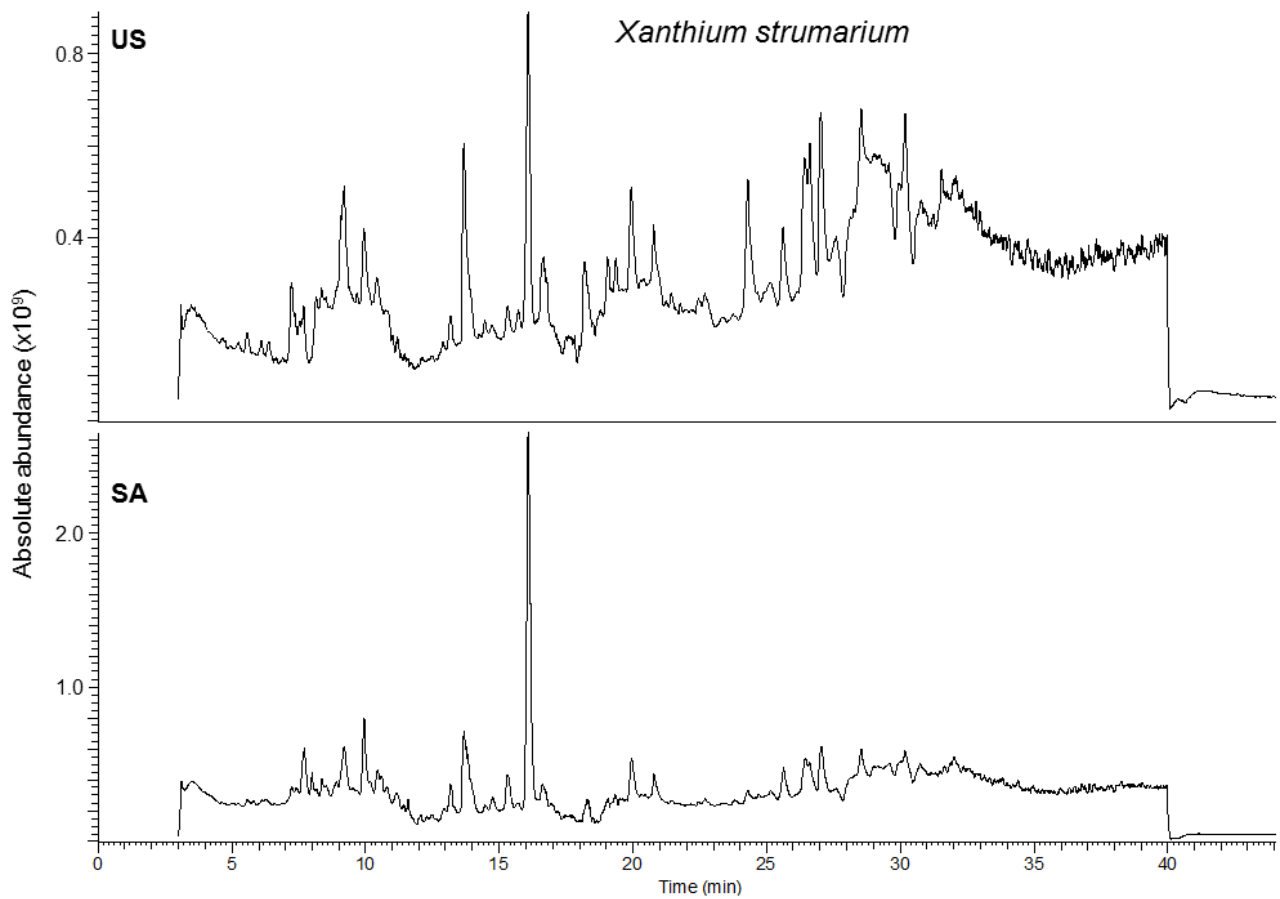

**S2 Fig. 3.** (-)ESI MS total ion current chromatograms [m/z 100 – m/z 1000] of disk eluates from *Xanthium strumarium* extracts from plants originating in the United States (US), and South Africa (SA).

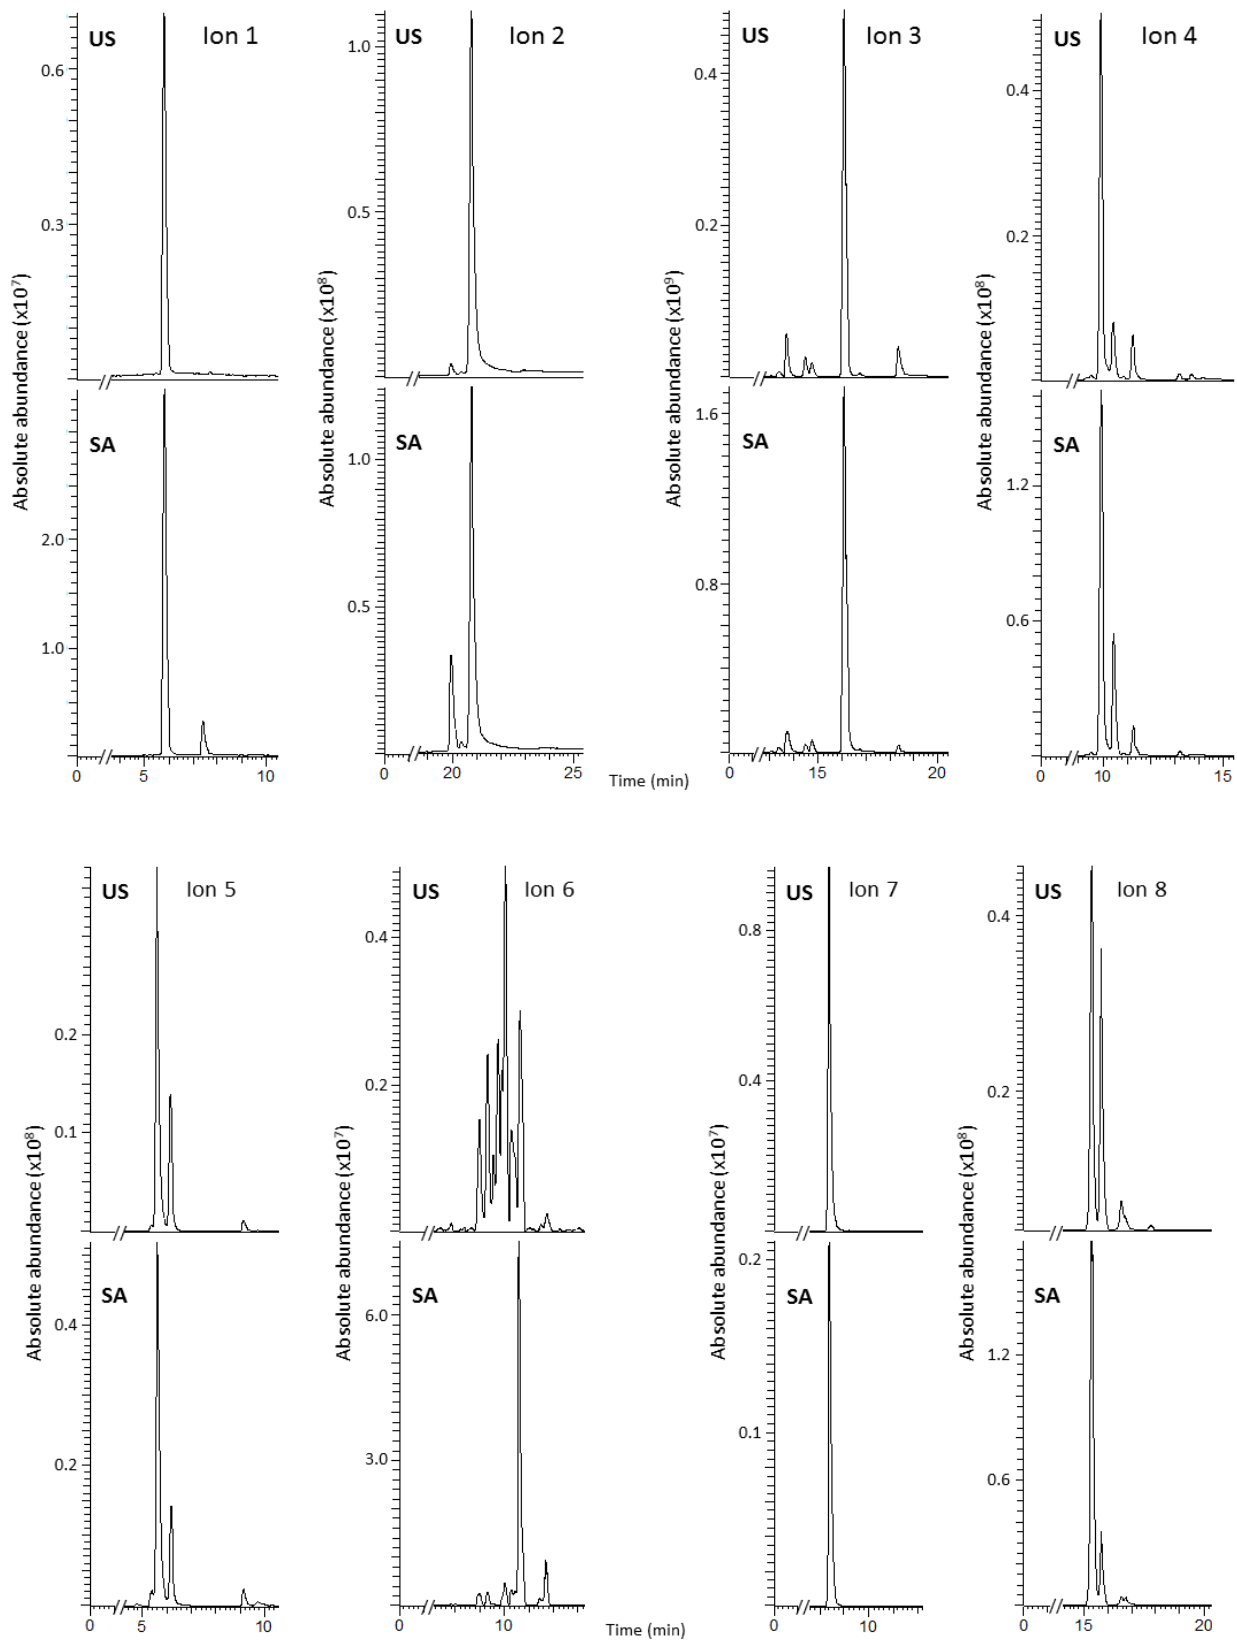

**S2 Fig. 4.** (-)ESI MS extracted ion current chromatograms of disk eluates from *Xanthium strumarium* extracts from plants originating in the United States (US), and South Africa (SA). Ion number details – see Table 2.

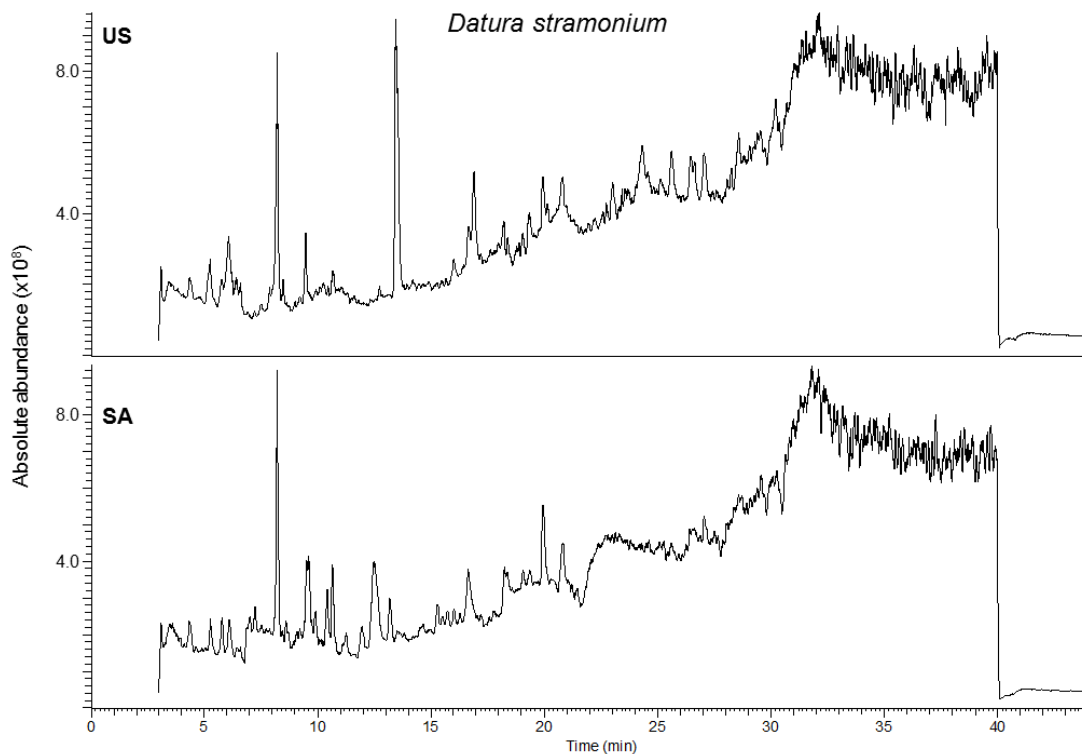

**S2 Fig. 5.** (-)ESI MS total ion current chromatograms [m/z 100 – m/z 1000] of disk eluates from *Datura stramonium* extracts of plants from the United States (US), and South Africa (SA).

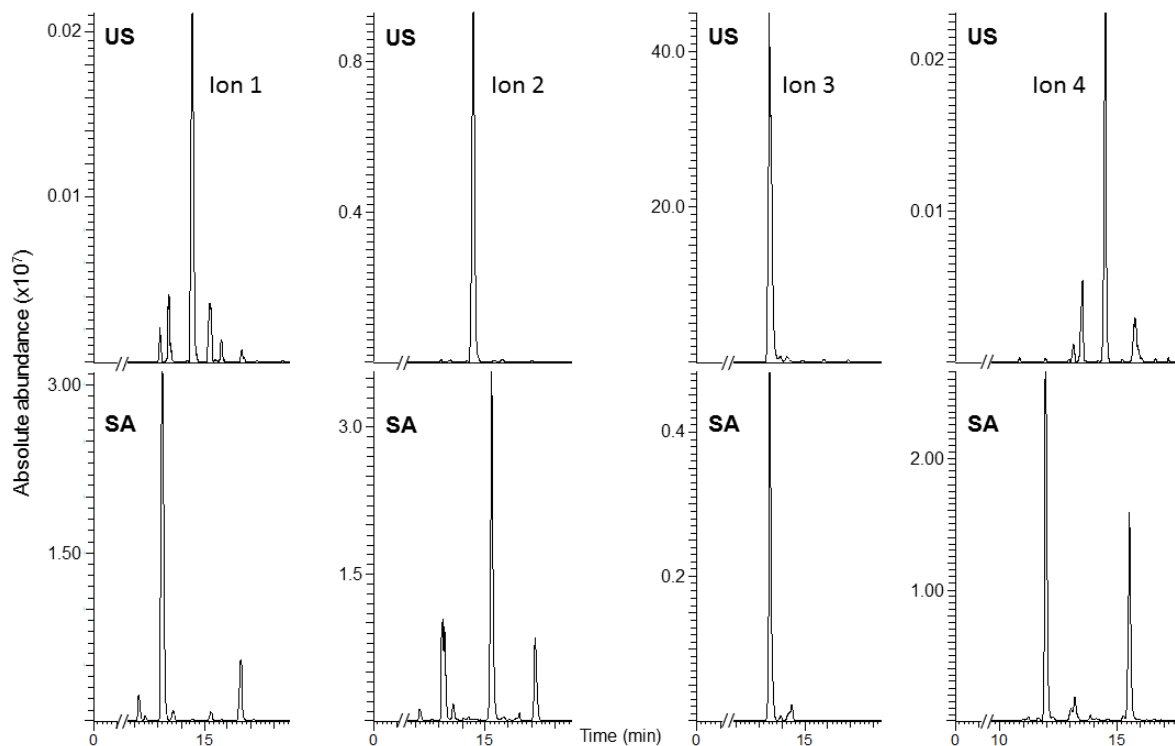

**S2 Fig. 6.** (-)ESI MS extracted ion current chromatograms of disk eluates from *Datura stramonium* extracts from plants originating in the United States (US), and South Africa (SA). Ion number details – see Table 3.



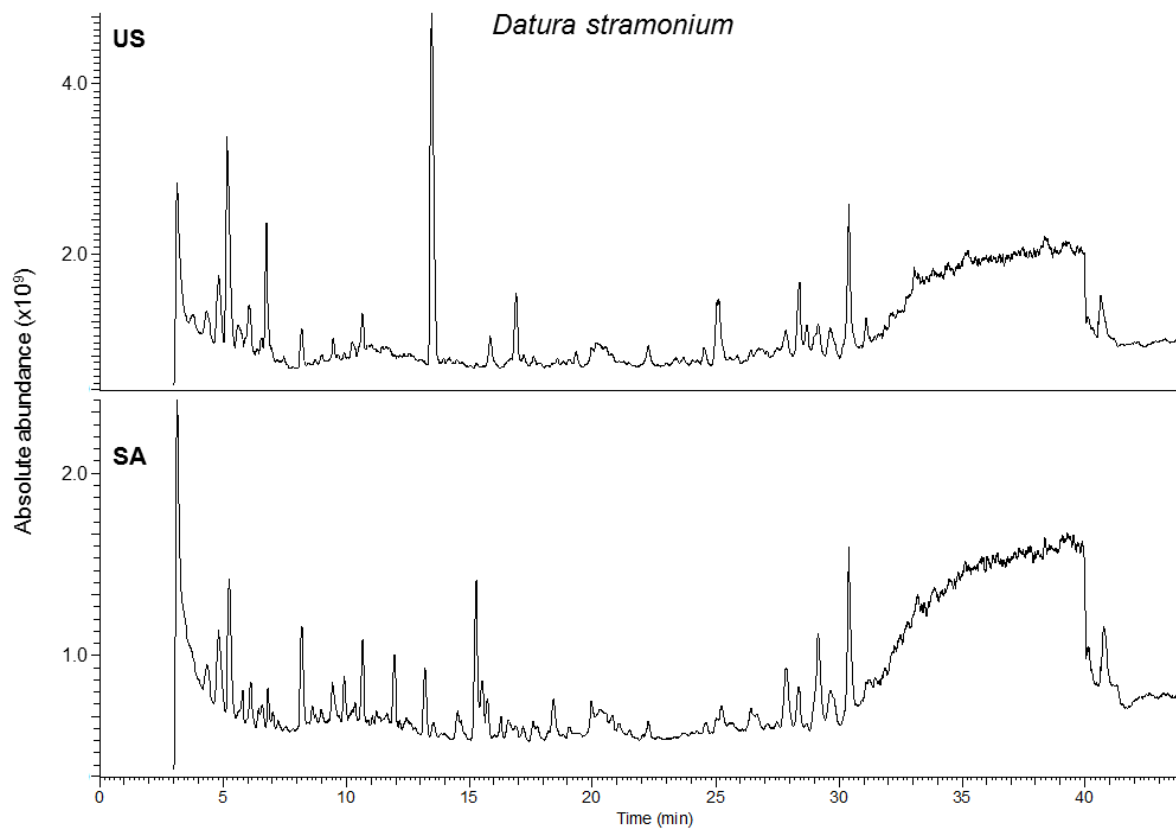

**S2 Fig. 7.** (+)ESI MS total ion current chromatograms [m/z 100 – m/z 1000] of disk eluates from *Datura stramonium* extracts of plants from the United States (US), and South Africa (SA).

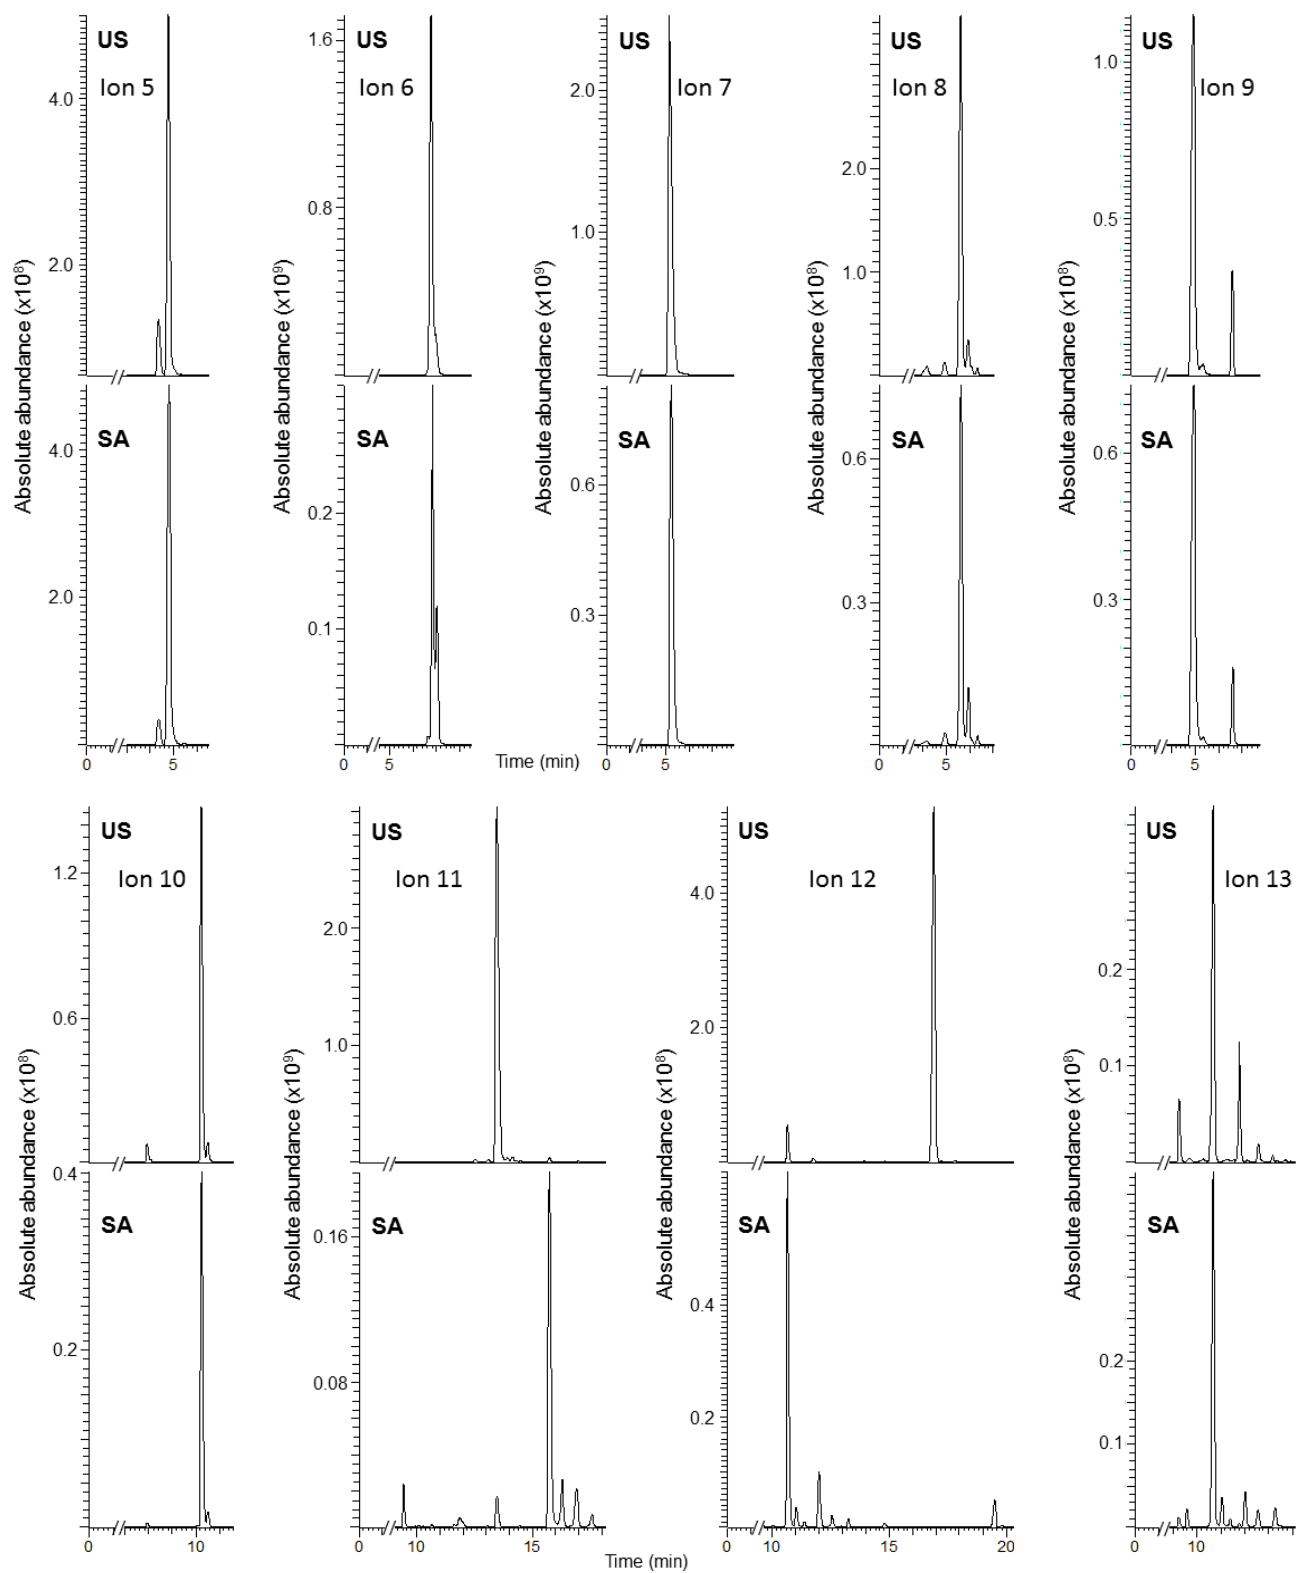

**S2 Fig. 8.** (+)ESI MS extracted ion current chromatograms of disk eluates from *Datura stramonium* extracts from plants originating in the United States (US), and South Africa (SA). Ion number details – see Table 3.
